# Supplementary material for: Treatment satisfaction in patients with relapsing-remitting multiple sclerosis initiated on teriflunomide in routine clinical practice: Australian observational data
Source: HighWire-hosted journal article supplement (doi:10.1136/bmjno-2022-000315), 2022-07-01
Supplement: bmjno-2022-000315supp001_data_supplement.pdf [file bmjno-2022-000315supp001_data_supplement.pdf]

## Supplementary file

Australian observational data: Treatment satisfaction in patients with relapsing-remitting multiple sclerosis initiated on teriflunomide in routine clinical practice

Supplementary Figure 1. Study design and assessment schedule

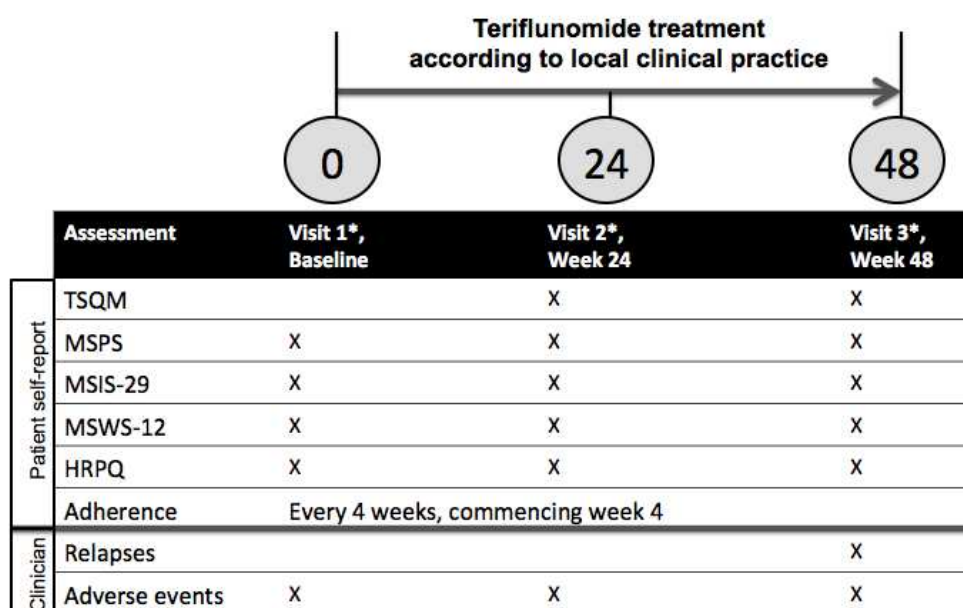

\* Clinic visits were scheduled as per local clinical practice. Responses for patient-reported outcomes were recorded electronically at each scheduled assessment.

TSQM, Treatment Satisfaction Questionnaire for Medication; MSPS, Multiple Sclerosis Performance Scale; MSIS-29 Multiple Sclerosis Impact Scale; MSWS-12, Multiple Sclerosis Walking Scale; HRPQ, Health-Related Productivity Questionnaire.

## Supplementary Figure 2. TSQM correlation matrix heat maps.

Interpretation: 0.0 = no correlation between variables, 1.0 = perfect correlation between variables, -1.0 = perfect negative correlation between variables, 0 to 1.0 = the two variables tend to increase or decrease together, -1 to 0 = one variable increases as the other decreases. The further the value is from zero, there are four possible explanations: (1) changes in variable X causes a change in variable y, (2) changes in variable y causes a change in variable x, (3) changes in another variable influence x and y, (4) no real correlation, the observed correlation has occurred by chance. P values are used to determine if the correlation is real or due to chance/random sampling,  $p < 0.05$  is used to determine significance (and are denoted on the maps as green boxes).

## A. TSQM domains (at weeks 24 and 48) and relapses in the last year.

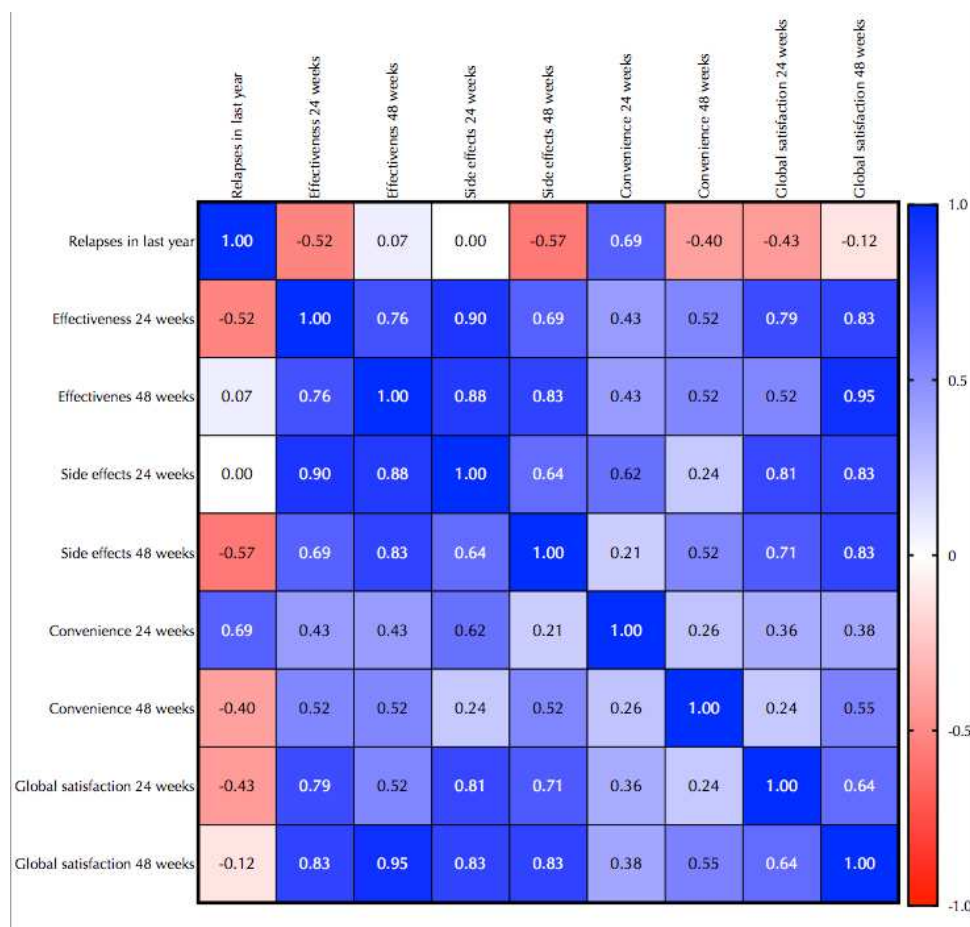

| Comparison:                  | Spearman r | Confidence interval | P value |
|------------------------------|------------|---------------------|---------|
| Relapses in last year versus |            |                     |         |
| Effectiveness 24 weeks       | 0.07514    | -0.1492 to 0.2921   | 0.4996  |
| Effectiveness 48 weeks       | 0.02042    | -0.2316 to 0.2698   | 0.8717  |
| Side effects 24 weeks        | -0.04305   | -0.3280 to 0.2491   | 0.769   |
| Side effects 48 weeks        | -0.1187    | -0.4524 to 0.2441   | 0.5106  |
| Convenience 24 weeks         | -0.0577    | -0.2760 to 0.1663   | 0.6044  |
| Convenience 48 weeks         | -0.1248    | -0.3642 to 0.1301   | 0.322   |
| Global satisfaction 24 weeks | 0.07134    | -0.1529 to 0.2886   | 0.5216  |
| Global satisfaction 48 weeks | 0.009029   | -0.2423 to 0.2592   | 0.9431  |

B. TSQM domains (at weeks 24 and 48) and missed doses over the entire study period, weeks 0-24 and weeks 28-48

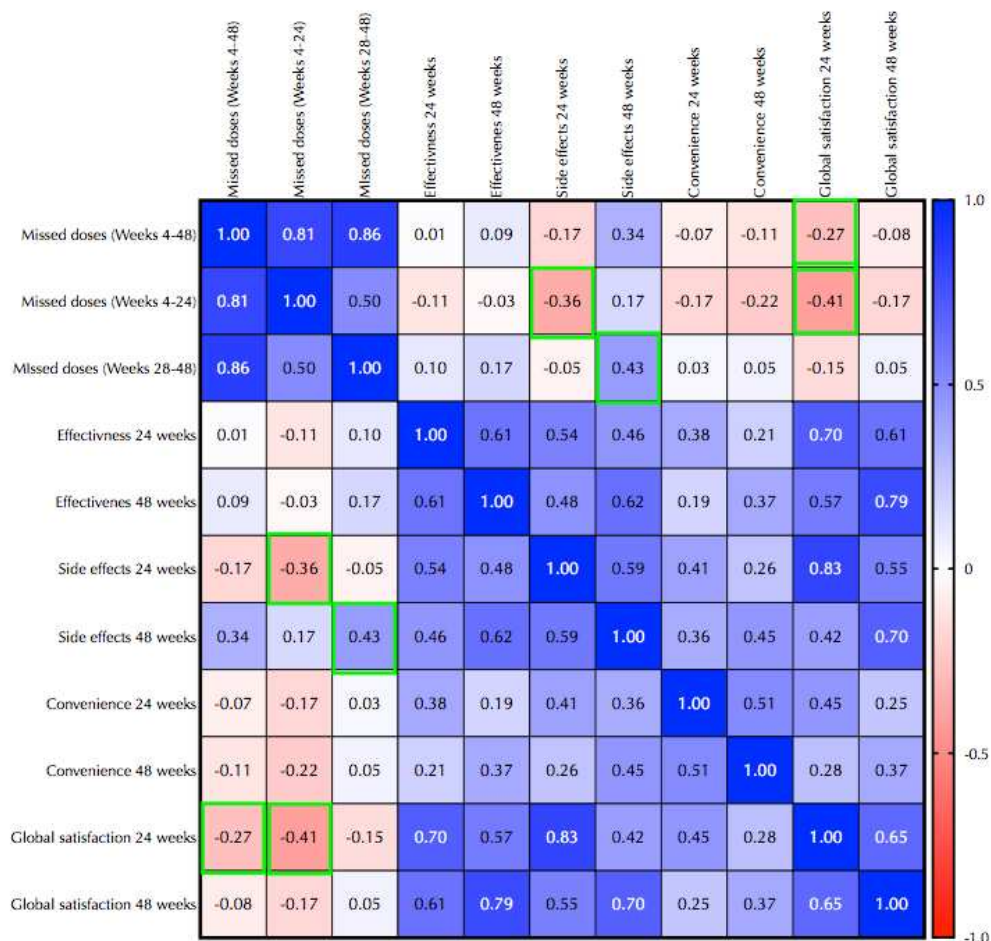

| Comparison:                             | Spearman r        | Confidence interval        | P value        |
|-----------------------------------------|-------------------|----------------------------|----------------|
| <b>Missed doses (4-48 weeks) versus</b> |                   |                            |                |
| Effectiveness 24 weeks                  | 0.006474          | -0.2157 to 0.2280          | 0.9537         |
| Effectiveness 48 weeks                  | 0.08595           | -0.1685 to 0.3296          | 0.496          |
| Side effects 24 weeks                   | -0.1718           | -0.4390 to 0.1234          | 0.2379         |
| Side effects 48 weeks                   | 0.3395            | -0.01488 to 0.6181         | 0.0532         |
| Convenience 24 weeks                    | -0.06933          | -0.2868 to 0.1549          | 0.5334         |
| Convenience 48 weeks                    | -0.1136           | -0.3543 to 0.1412          | 0.3675         |
| Global satisfaction 24 weeks            | -0.2719           | -0.4657 to -0.05324        | 0.0129         |
| Global satisfaction 48 weeks            | -0.08277          | -0.3268 to 0.1716          | 0.5122         |
| <b>Comparison:</b>                      | <b>Spearman r</b> | <b>Confidence interval</b> | <b>P value</b> |
| <b>Missed doses (4-24 weeks) versus</b> |                   |                            |                |
| Effectiveness 24 weeks                  | -0.1103           | -0.3242 to 0.1144          | 0.3209         |
| Effectiveness 48 weeks                  | -0.03241          | -0.2809 to 0.2202          | 0.7977         |
| Side effects 24 weeks                   | -0.3568           | -0.5855 to -0.07555        | 0.0118         |
| Side effects 48 weeks                   | 0.1666            | -0.1976 to 0.4904          | 0.3541         |
| Convenience 24 weeks                    | -0.1733           | -0.3806 to 0.05045         | 0.1171         |
| Convenience 48 weeks                    | -0.223            | -0.4487 to 0.02944         | 0.0741         |

|                                          |                   |                            |                |
|------------------------------------------|-------------------|----------------------------|----------------|
| <b>Global satisfaction 24 weeks</b>      | -0.4098           | -0.5790 to -0.2067         | 0.0001         |
| <b>Global satisfaction 48 weeks</b>      | -0.1739           | -0.4070 to 0.08040         | 0.1659         |
| <b>Comparison:</b>                       | <b>Spearman r</b> | <b>Confidence interval</b> | <b>P value</b> |
| <b>Missed doses (28-48 weeks) versus</b> |                   |                            |                |
| <b>Effectiveness 24 weeks</b>            | 0.09807           | -0.1265 to 0.3131          | 0.3778         |
| <b>Effectiveness 48 weeks</b>            | 0.1745            | -0.07983 to 0.4075         | 0.1645         |
| <b>Side effects 24 weeks</b>             | -0.05416          | -0.3379 to 0.2386          | 0.7117         |
| <b>Side effects 48 weeks</b>             | 0.4323            | 0.09400 to 0.6811          | 0.012          |
| <b>Convenience 24 weeks</b>              | 0.03424           | -0.1891 to 0.2542          | 0.7586         |
| <b>Convenience 48 weeks</b>              | 0.04841           | -0.2049 to 0.2956          | 0.7018         |
| <b>Global satisfaction 24 weeks</b>      | -0.1515           | -0.3612 to 0.07279         | 0.1715         |
| <b>Global satisfaction 48 weeks</b>      | 0.05404           | -0.1995 to 0.3008          | 0.669          |

Supplementary Figure 3. Multiple sclerosis performance scale – scores for individual sub-scales at baseline and week 48.

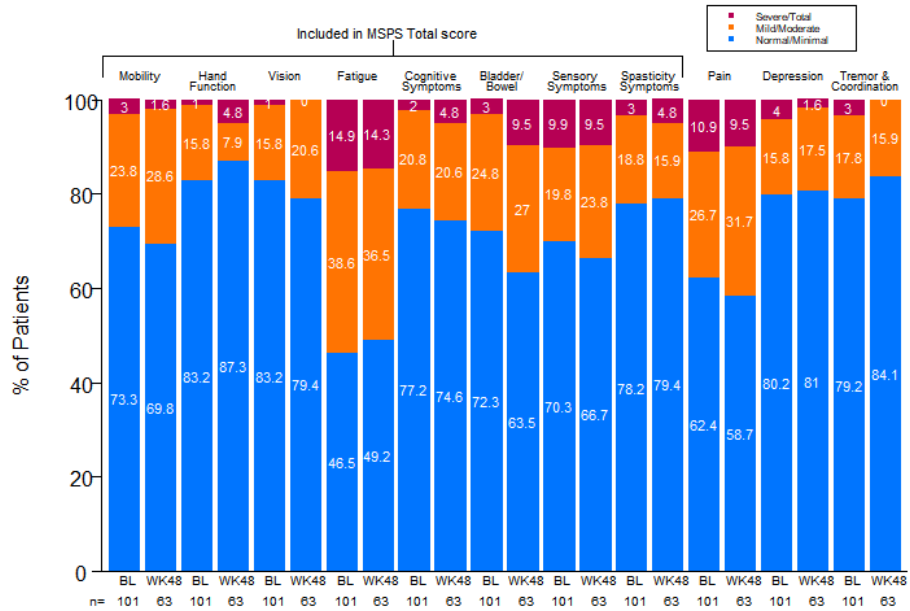

Supplementary Figure 4. Work capacity and daily life activity: Mean (SD) percentage of work lost due to absenteeism and presenteeism.

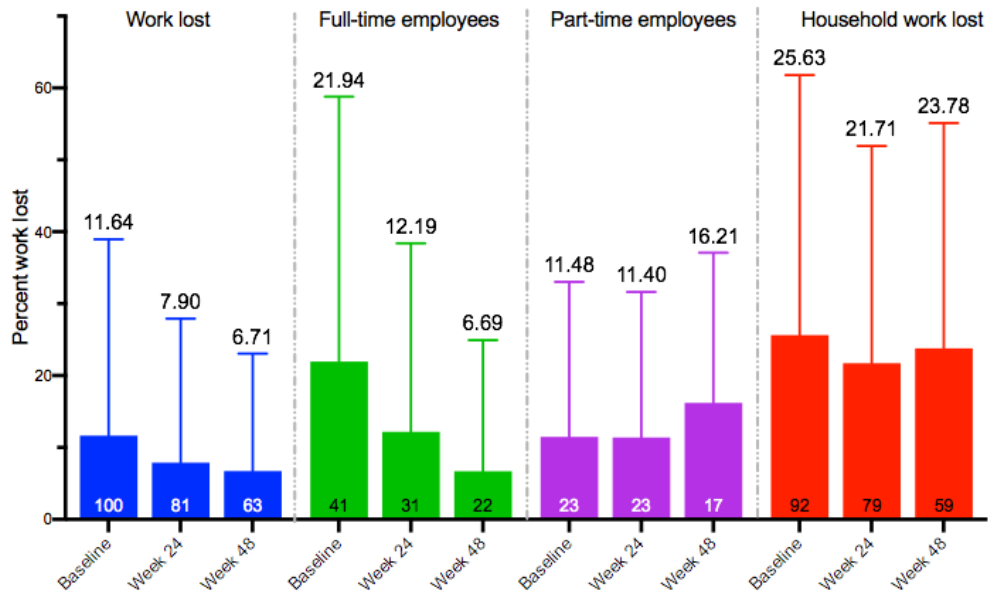

Supplementary Table 1. Treatment Satisfaction for Medication Scores and Treatment Subgroup.

| <b>Parameter</b>    | <b>Scheduled Visit</b> | <b>Previous Treatment</b> | <b>n</b> | <b>Mean (SD)</b> |
|---------------------|------------------------|---------------------------|----------|------------------|
| Effectiveness       | Week 24                | Naive                     | 44       | 63.01 (17.73)    |
|                     |                        | DMT Injectables           | 23       | 59.42 (17.12)    |
|                     |                        | Orals                     | 15       | 70.37 (19.99)    |
|                     | Week 48                | Naive                     | 39       | 66.52 (18.53)    |
|                     |                        | DMT Injectables           | 17       | 55.55 (19.64)    |
|                     |                        | Orals                     | 8        | 70.14 (21.19)    |
| Side Effects        | Week 24                | Naive                     | 44       | 87.93 (20.06)    |
|                     |                        | DMT Injectables           | 23       | 69.02 (26.48)    |
|                     |                        | Orals                     | 15       | 69.58 (32.72)    |
|                     | Week 48                | Naive                     | 40       | 82.50 (22.92)    |
|                     |                        | DMT Injectables           | 18       | 87.50 (18.81)    |
|                     |                        | Orals                     | 10       | 79.38 (27.80)    |
| Convenience         | Week 24                | Naive                     | 44       | 88.89 (13.07)    |
|                     |                        | DMT Injectables           | 23       | 87.68 (13.60)    |
|                     |                        | Orals                     | 15       | 83.33 (21.41)    |
|                     | Week 48                | Naive                     | 39       | 91.88 (9.94)     |
|                     |                        | DMT Injectables           | 17       | 84.31 (14.99)    |
|                     |                        | Orals                     | 8        | 84.72 (14.16)    |
| Global Satisfaction | Week 24                | Naive                     | 44       | 63.96 (23.00)    |
|                     |                        | DMT Injectables           | 23       | 49.69 (24.32)    |
|                     |                        | Orals                     | 15       | 62.38 (29.51)    |
|                     | Week 48                | Naive                     | 39       | 65.20 (24.70)    |
|                     |                        | DMT Injectables           | 17       | 61.34 (24.10)    |
|                     |                        | Orals                     | 8        | 69.64 (21.85)    |

Supplementary Table 2. Health-related productivity questionnaire: mean scores at baseline, week 24 and week 48.

| <b>Parameter</b>                                                | <b>Scheduled Visit</b> | <b>n</b> | <b>Mean (SD)</b> |
|-----------------------------------------------------------------|------------------------|----------|------------------|
| Hours of lost work due to absenteeism                           | Baseline               | 64       | 5.63 (13.61)     |
|                                                                 | Week 24                | 54       | 2.52 (9.57)      |
|                                                                 | Week 48                | 39       | 1.08 (5.02)      |
| Hours of household lost work due to absenteeism                 | Baseline               | 92       | 1.47 (3.23)      |
|                                                                 | Week 24                | 79       | 0.86 (2.26)      |
|                                                                 | Week 48                | 59       | 1.20 (2.85)      |
| Hours worked                                                    | Baseline               | 64       | 25.92<br>(16.48) |
|                                                                 | Week 24                | 54       | 28.72<br>(14.87) |
|                                                                 | Week 48                | 39       | 28.51<br>(12.80) |
| Household hours worked                                          | Baseline               | 92       | 9.60 (9.87)      |
|                                                                 | Week 24                | 79       | 9.51 (8.60)      |
|                                                                 | Week 48                | 59       | 8.92 (8.96)      |
| Hours of lost work due to presenteeism                          | Baseline               | 64       | 0.89 (1.64)      |
|                                                                 | Week 24                | 54       | 1.62 (3.11)      |
|                                                                 | Week 48                | 39       | 1.77 (3.35)      |
| Hours of household work lost due to presenteeism                | Baseline               | 92       | 1.63 (3.83)      |
|                                                                 | Week 24                | 79       | 1.17 (2.35)      |
|                                                                 | Week 48                | 59       | 1.81 (5.48)      |
| Total (absenteeism + presenteeism) hours of work lost           | Baseline               | 100      | 4.17 (11.27)     |
|                                                                 | Week 24                | 81       | 2.76 (9.43)      |
|                                                                 | Week 48                | 63       | 1.76 (5.03)      |
| Total (absenteeism + presenteeism) hours of household work lost | Baseline               | 92       | 3.10 (6.11)      |
|                                                                 | Week 24                | 79       | 2.03 (3.87)      |
|                                                                 | Week 48                | 59       | 3.01 (6.47)      |
| % Work lost due to absenteeism                                  | Baseline               | 64       | 14.44<br>(32.44) |
|                                                                 | Week 24                | 54       | 6.12 (19.62)     |
|                                                                 | Week 48                | 39       | 3.21 (13.05)     |
| % Household lost work lost due to absenteeism                   | Baseline               | 92       | 15.42<br>(29.58) |
|                                                                 | Week 24                | 79       | 11.17<br>(23.72) |
|                                                                 | Week 48                | 59       | 12.84<br>(26.59) |
| % Work lost due to presenteeism                                 | Baseline               | 64       | 3.74 (7.22)      |
|                                                                 | Week 24                | 54       | 5.73 (9.79)      |
|                                                                 | Week 48                | 39       | 7.63 (15.02)     |
| % Household work lost due to presenteeism                       | Baseline               | 92       | 10.22<br>(17.78) |



|                                                                                                           |                        |          |                        |
|-----------------------------------------------------------------------------------------------------------|------------------------|----------|------------------------|
|                                                                                                           | Week 24                | 79       | 10.54<br>(17.88)       |
|                                                                                                           | Week 48                | 59       | 10.94<br>(17.17)       |
| <b>Parameter</b>                                                                                          | <b>Scheduled Visit</b> | <b>n</b> | <b>Mean (SD)</b>       |
| % Work lost due to absenteeism + presenteeism                                                             | Baseline               | 100      | 11.64<br>(27.30)       |
|                                                                                                           | Week 24                | 81       | 7.90 (20.04)           |
|                                                                                                           | Week 48                | 63       | 6.71 (16.35)           |
| % Household work lost due to absenteeism + presenteeism                                                   | Baseline               | 92       | 25.63<br>(36.15)       |
|                                                                                                           | Week 24                | 79       | 21.71<br>(30.21)       |
|                                                                                                           | Week 48                | 59       | 23.78<br>(31.32)       |
| % work lost due to absenteeism + presenteeism in full time employees                                      | Baseline               | 41       | 21.94<br>(36.85)       |
|                                                                                                           | Week 24                | 31       | 12.19<br>(26.20)       |
|                                                                                                           | Week 48                | 22       | 6.69 (18.23)           |
| % work lost due to absenteeism + presenteeism in part time employees                                      | Baseline               | 23       | 11.48<br>(21.56)       |
|                                                                                                           | Week 24                | 23       | 11.40<br>(20.24)       |
|                                                                                                           | Week 48                | 17       | 16.21<br>(20.88)       |
| Hours of lifetime productivity lost due to illness induced part-time work when worked full-time           | Baseline               | 31       | 3499.12<br>(6447.02)   |
| Hours of lifetime productivity lost due to illness induced retirement when worked full-time               | Baseline               | 31       | 6584.35<br>(15734.90)  |
| Hours of lifetime productivity lost due to illness induced retirement when worked part-time               | Baseline               | 31       | 2041.64<br>(6593.63)   |
| Calculation of total hours of lifetime productivity lost due to illness impact on workforce participation | Baseline               | 31       | 12125.11<br>(24593.94) |
